# Supplementary material for: Photochemical formation of the elusive Dewar isomers of aromatic systems: why are substituted azaborines different?
Source: Royal Society of Chemistry journal article supplement (doi:10.1039/d4cp00777h), 2024-01-01
Supplement: d4cp00777h1.pdf [file d4cp00777h1.pdf]

## Electronic supplementary information

### Photochemical formation of the elusive Dewar isomers of aromatic systems: why are substituted azaborines different?

Enrique M. Arpa,<sup>\*ab</sup> Sven Stafström<sup>c</sup> and Bo Durbeej<sup>\*a</sup>

#### Table of contents

|    |                                                                             |         |
|----|-----------------------------------------------------------------------------|---------|
| 1. | Complementary CASPT2 calculations                                           | Page S2 |
| 2. | Geometries of optimized conical intersections                               | Page S3 |
| 3. | Reaction dynamics following internal conversion                             | Page S4 |
| 4. | Reaction pathways for the formation of other (than Dewar) photoproducts     | Page S5 |
| 5. | Cartesian coordinates and total electronic energies of optimized geometries | Page S6 |

---

<sup>a</sup>Division of Theoretical Chemistry, IFM, Linköping University, 58183 Linköping, Sweden. E-mail: bodur@ifm.liu.se

<sup>b</sup>Institute of Organic Chemistry, RWTH Aachen University, 52056 Aachen, Germany. E-mail: enrique.arpa@rwth-aachen.de

<sup>c</sup>Division of Theoretical Physics, IFM, Linköping University, 58183 Linköping, Sweden.

## 1. Complementary CASPT2 calculations

In order to assess whether the shapes of the  $S_1$  PESs in Fig. 6 of the main text, as predicted by TD-DFT (TD-CAM-B3LYP/cc-pVTZ//TD-CAM-B3LYP/cc-pVDZ), are qualitatively accurate, the energies of the key points on these PESs were also obtained by performing single-point calculations at the MS-CASPT2/cc-pVTZ level of theory. The resulting energies are compared to the TD-DFT ones in Fig. S1, with the former given in red color and the latter in black color. Encouragingly, even though the actual  $S_1$  energies relative to the  $S_0$  state differ between the two methodologies, the shapes that MS-CASPT2 predicts for the  $S_1$  PESs are consistent with those that TD-DFT provides. Specifically, MS-CASPT2 corroborates all the key findings by TD-DFT discussed in the main text: (a) that the  $S_0/S_1$  CI lies *above* the  $S_1$  FC point for the benzenes but *below* for the azaborines, (b) that the  $S_0/S_1$  CI for the unsubstituted azaborine is reached in a barrierless fashion, and (c) that the minimum on the  $S_1$  PES of 1-silyl-2-chloroazaborine is separated from the  $S_0/S_1$  CI by a very small barrier.

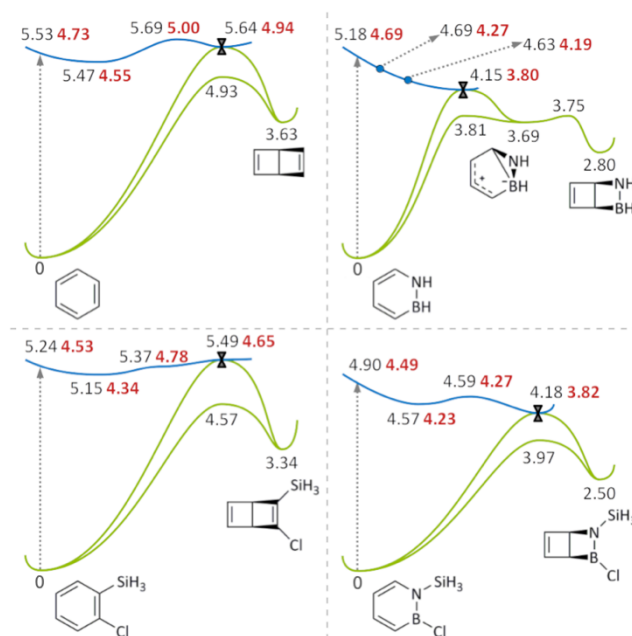

**Fig. S1** Calculated  $S_0$  (green) and  $S_1$  (blue) PESs of benzene (top left), azaborine (top right), 1-silyl-2-chlorobenzene (bottom left) and 1-silyl-2-chloroazaborine (bottom right), with dashed vertical lines indicating photoexcitation to the respective  $S_1$  FC point and local maxima corresponding to transition structures (TSs).  $S_1/S_0$  CIs are indicated with hourglass symbols. For each system, TD-DFT/MS-CASPT2 electronic energies of the relevant structures (stationary points, the  $S_1$  FC point, and the  $S_1/S_0$  CI) are given in eV in black/red color relative to the corresponding  $S_0$  global minimum. For the unsubstituted azaborine, the calculations consider two additional  $S_1$  structures, as described in the caption for Fig. 8 of the main text.

## 2. Geometries of optimized conical intersections

The geometries of the optimized minimum-energy  $S_1/S_0$  CIs in Fig. 6 of the main text are shown in Fig. S2. Although it is common for methods used to perform such optimizations to employ both of the gradient-difference and non-adiabatic coupling vectors spanning the so-called “branching space” in which the  $S_1/S_0$  degeneracy is lifted,<sup>1</sup> the CI geometries in Fig. S2 were optimized with an implementation of a penalty-function method in the SHARC 2.0 package<sup>2</sup> that only requires calculation of the former vector.<sup>1</sup> Accordingly, for each CI geometry, Fig. S2 plots (in blue color) this vector, but not the non-adiabatic coupling vector. Furthermore, while the branching space is multidimensional,<sup>3</sup> Fig. S2 also highlights (in red color) the distances at the CI geometries between the two C atoms that subsequently form a bond in the  $S_0$  Dewar isomers, and how these distances evolve from the  $S_0$  parent species to the  $S_0$  Dewar isomers.

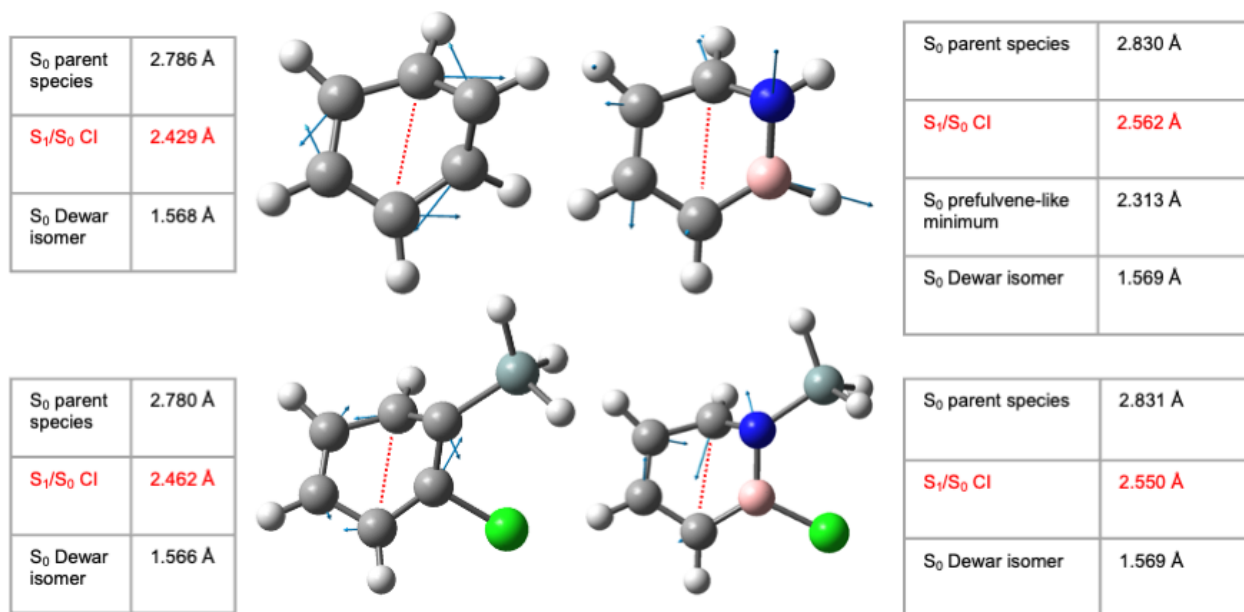

**Fig. S2** Geometries of the optimized minimum-energy  $S_1/S_0$  CIs of benzene (top left), azaborine (top right), 1-silyl-2-chlorobenzene (bottom left) and 1-silyl-2-chloroazaborine (bottom right) in Fig. 6 of the main text, with C, H, B, N, Si and Cl atoms shown in grey, light-grey, pink, blue, dark-turquoise and green colors, respectively. For each CI geometry, shown in blue color is also the gradient-difference vector and in red color the distance between the two C atoms that form a bond in the corresponding  $S_0$  Dewar isomer.

- 1 B. G. Levine, J. D. Coe and T. J. Martínez, Optimizing conical intersections without derivative coupling vectors: Application to multistate multireference second-order perturbation theory (MS-CASPT2), *J. Phys. Chem. B*, 2008, **112**, 405–413.
- 2 S. Mai, P. Marquetand and L. González, Nonadiabatic dynamics: the SHARC approach, *WIREs Comput. Mol. Sci.*, 2018, **8**, e1370.
- 3 F. Bernardi, M. Olivucci and M. A. Robb, Potential energy surface crossings in organic photochemistry, *Chem. Soc. Rev.*, 1996, **25**, 321–328.

### 3. Reaction dynamics following internal conversion

As discussed in connection to Fig. 6 of the main text, three different reaction channels are of particular interest for the  $S_0$  dynamics of the unsubstituted azaborine following IC from the  $S_1$  state. These channels are illustrated in Fig. S3a, using blue color for the formation of the Dewar isomer through the prefulvene-like minimum, green color for the back-reaction forming the parent azaborine through the prefulvene-like minimum, and red color for the direct back-reaction to the parent azaborine. Fig. S3b, in turn, plots calculated NAMD trajectories that describe these three cases, as differentiated by how the B–C<sub>6</sub> distance changes during the simulations. From these plots, it can be seen that the trajectories evolve very similarly from the  $S_1$  FC point (at time  $t = 0$ ) to the instance when IC takes place (at  $t \approx 100$  fs), which is indicated with dotted vertical lines. However, following IC, the trajectories become distinctly different, with that for the direct back-reaction (red color) not spending any time in the region of the prefulvene-like minimum (where B–C<sub>6</sub>  $\approx 1.8$  Å). In sharp contrast, the trajectories for the formation of the Dewar isomer (blue color) and the indirect back-reaction (green color) do populate this region for some 150 and 100 fs, respectively.

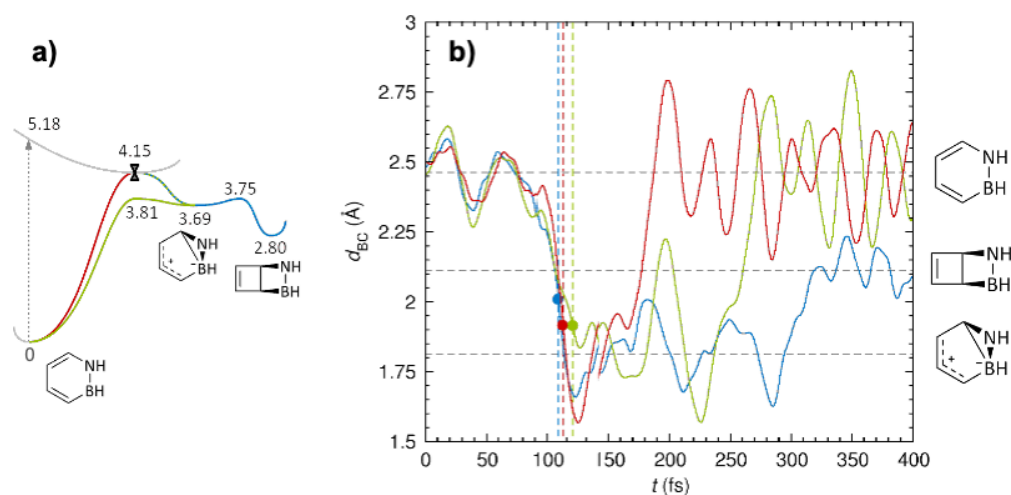

**Fig. S3** a) Different reaction channels for the  $S_0$  dynamics of the unsubstituted azaborine following IC from the  $S_1$  state, here illustrated based on the corresponding  $S_0$  PES derived from Fig. 6 of the main text. b) Changes in B–C<sub>6</sub> distance during three different NAMD trajectories that describe these reaction channels. No relevant changes in this distance occur beyond 400 fs.

#### 4. Reaction pathways for the formation of other (than Dewar) photoproducts

Fig. 7 of the main text presents the portions of the  $S_0$  PES of azaborine that are relevant for comparing different reaction pathways starting from the prefulvene-like minimum formed upon IC at the  $S_1/S_0$  CI. Fig. S4, in turn, shows the optimized geometries of the potential-energy minima along these pathways.

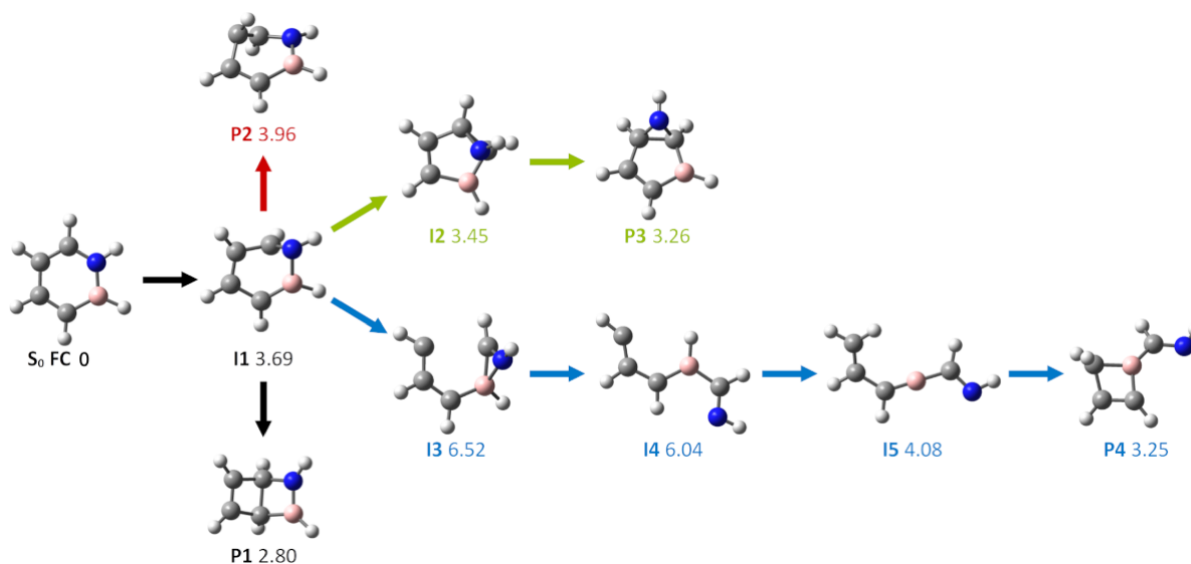

**Fig. S4** Optimized geometries of different minima on the  $S_0$  PES of azaborine connected to the **I1** prefulvene-like minimum formed upon IC at the  $S_1/S_0$  CI, with C, H, B and N atoms shown in grey, light-grey, pink and blue colors, respectively. The electronic energies of the minima are given in eV relative to the  $S_0$  global minimum (labeled  $S_0$  FC).

## 5. Cartesian coordinates and total electronic energies of optimized geometries

Each geometry is identified by referring to the relative electronic energy or label it is associated with in a specific Figure of the main text, as indicated below. Coordinates are given in Å (CAM-B3LYP/cc-pVDZ). Total electronic energies ( $E$ ) of  $S_0$  and  $S_1$  states are given in a.u. (CAM-B3LYP/cc-pVTZ). For geometries corresponding to transition structures (TSs), the imaginary vibrational frequency is given in  $\text{cm}^{-1}$ . For all structures except TSs, all vibrational frequencies were found to be real.

### 5.1. Azaborine

$S_0$  geometry with relative electronic energy 0 eV in Fig. 6 of the main text

$E(S_0) = -235.623975093$  a.u.

$E(S_1) = -235.433699513$  a.u.

|   |           |           |           |
|---|-----------|-----------|-----------|
| N | 1.273663  | 0.488102  | 0.000012  |
| B | 0.227011  | 1.462547  | 0.000019  |
| C | -1.172761 | 0.890697  | 0.000005  |
| C | -1.330928 | -0.472218 | -0.000012 |
| C | -0.215798 | -1.357402 | -0.000017 |
| C | 1.052600  | -0.857468 | -0.000005 |
| H | 2.245466  | 0.774387  | 0.000020  |
| H | 0.539892  | 2.624712  | 0.000034  |
| H | -2.071615 | 1.512402  | 0.000009  |
| H | -2.330550 | -0.919300 | -0.000022 |
| H | -0.362886 | -2.437257 | -0.000031 |
| H | 1.930313  | -1.506044 | -0.000009 |

$S_1$  geometry with relative electronic energy 4.69 eV in Fig. 8 of the main text

$E(S_0) = -235.545739479$  a.u.

$E(S_1) = -235.451559412$  a.u.

|   |           |           |           |
|---|-----------|-----------|-----------|
| N | 1.432180  | 0.143724  | -0.390203 |
| B | 0.561774  | 1.255778  | 0.132164  |
| C | -0.936227 | 1.121592  | 0.046102  |
| C | -1.468041 | -0.178992 | -0.129730 |
| C | -0.566094 | -1.221591 | 0.036688  |
| C | 0.832113  | -0.939403 | 0.190815  |
| H | 2.428071  | 0.208513  | -0.207117 |
| H | 1.136920  | 2.142151  | 0.718579  |
| H | -1.618865 | 1.967154  | 0.160299  |
| H | -2.526118 | -0.375463 | -0.314006 |
| H | -0.885239 | -2.264425 | 0.110770  |
| H | 1.460597  | -1.652528 | 0.738835  |

$S_1$  geometry with relative electronic energy 4.63 eV in Fig. 8 of the main text

$E(S_0) = -235.502160480$  a.u.

$E(S_1) = -235.453642259$  a.u.

|   |           |           |           |
|---|-----------|-----------|-----------|
| N | 1.438683  | 0.040985  | -0.456762 |
| B | 0.633177  | 1.179110  | 0.128310  |
| C | -0.868969 | 1.155243  | 0.058869  |
| C | -1.478817 | -0.114089 | -0.129289 |
| C | -0.637528 | -1.190461 | 0.025605  |

|   |           |           |           |
|---|-----------|-----------|-----------|
| C | 0.768202  | -0.902488 | 0.267135  |
| H | 2.432892  | 0.068663  | -0.247117 |
| H | 1.290273  | 2.025014  | 0.684026  |
| H | -1.493064 | 2.037923  | 0.213504  |
| H | -2.539123 | -0.246723 | -0.358736 |
| H | -0.957973 | -2.232768 | -0.046594 |
| H | 1.333002  | -1.523782 | 0.976781  |

$S_1/S_0$  CI geometry with relative electronic energy 4.15 eV in Fig. 6 of the main text

$E(S_0) = -235.472572300$  a.u.

$E(S_1) = -235.470217258$  a.u.

|   |           |           |           |
|---|-----------|-----------|-----------|
| N | -1.413079 | -0.073253 | -0.485176 |
| B | -0.701169 | 1.145913  | 0.097533  |
| C | 0.785104  | 1.179686  | 0.091383  |
| C | 1.474508  | -0.054323 | -0.122968 |
| C | 0.697838  | -1.162058 | -0.016282 |
| C | -0.708463 | -0.884905 | 0.360570  |
| H | -2.408557 | -0.067174 | -0.281268 |
| H | -1.427421 | 2.023412  | 0.481811  |
| H | 1.365046  | 2.091748  | 0.235798  |
| H | 2.538615  | -0.110478 | -0.354971 |
| H | 1.038212  | -2.180828 | -0.207917 |
| H | -1.202422 | -1.443865 | 1.158895  |

$S_0$  geometry with relative electronic energy 3.69 eV labeled **I1** in Fig. 7 of the main text

$E(S_0) = -235.488482780$  a.u.

|   |           |           |           |
|---|-----------|-----------|-----------|
| N | -1.456578 | -0.278704 | -0.497359 |
| B | -0.728841 | 1.066362  | -0.053805 |
| C | 0.751308  | 1.152218  | 0.039985  |
| C | 1.505994  | -0.069713 | -0.130848 |
| C | 0.694970  | -1.137977 | 0.020057  |
| C | -0.616470 | -0.654416 | 0.502542  |
| H | -2.429384 | -0.188788 | -0.197355 |
| H | -1.488878 | 1.919984  | 0.319135  |
| H | 1.262903  | 2.081303  | 0.315581  |
| H | 2.548460  | -0.102334 | -0.459278 |
| H | 0.831045  | -2.143514 | -0.381549 |
| H | -0.898707 | -0.688210 | 1.563597  |

$S_0$  geometry with relative electronic energy 3.45 eV labeled **I2** in Fig. 7 of the main text

$E(S_0) = -235.496951236$  a.u.

|   |           |           |           |
|---|-----------|-----------|-----------|
| N | 0.965752  | 0.014262  | 0.742758  |
| B | 0.083647  | 1.242124  | -0.064398 |
| C | -1.375277 | 0.595502  | 0.007053  |
| C | -1.199494 | -0.733740 | -0.021709 |
| C | 0.273756  | -1.012464 | -0.096941 |
| C | 0.999068  | 0.133715  | -0.731113 |
| H | 1.842454  | -0.168881 | 1.230423  |
| H | 0.435837  | 2.375455  | 0.116088  |
| H | -2.351392 | 1.071023  | 0.111869  |
| H | -1.946298 | -1.525435 | 0.053623  |
| H | 0.697885  | -2.018268 | -0.083561 |

|   |          |          |           |
|---|----------|----------|-----------|
| H | 1.954699 | 0.057570 | -1.249495 |
|---|----------|----------|-----------|

S<sub>0</sub> geometry with relative electronic energy 6.52 eV labeled **I3** in Fig. 7 of the main text

E(S<sub>0</sub>) = -235.384370051 a.u.

|   |           |           |           |
|---|-----------|-----------|-----------|
| N | -1.641728 | -0.107651 | 0.596060  |
| B | -0.820386 | 0.811017  | -0.452616 |
| C | 0.667033  | 1.138556  | -0.017680 |
| C | 1.630240  | 0.168885  | 0.192419  |
| C | 1.356705  | -1.174017 | -0.052649 |
| C | -1.227573 | -0.714760 | -0.444475 |
| H | -1.998673 | -0.470973 | 1.479280  |
| H | -1.472831 | 1.631783  | -1.049688 |
| H | 0.988864  | 2.181158  | 0.097892  |
| H | 2.632476  | 0.465157  | 0.543082  |
| H | 2.183451  | -1.851305 | -0.326303 |
| H | -1.297693 | -1.769335 | -0.719299 |

S<sub>0</sub> geometry with relative electronic energy 6.04 eV labeled **I4** in Fig. 7 of the main text

E(S<sub>0</sub>) = -235.402144184 a.u.

|   |           |           |           |
|---|-----------|-----------|-----------|
| N | -2.465600 | 0.597172  | 0.000422  |
| B | -0.379918 | -0.730422 | -0.000461 |
| C | 0.481988  | 0.524912  | -0.000124 |
| C | 1.908113  | 0.550826  | -0.000407 |
| C | 2.717272  | -0.516231 | 0.000589  |
| C | -1.949615 | -0.576735 | -0.000088 |
| H | -3.494286 | 0.543025  | 0.000655  |
| H | 0.117938  | -1.829297 | -0.001129 |
| H | -0.019944 | 1.497512  | 0.000192  |
| H | 2.406817  | 1.535845  | -0.001467 |
| H | 3.793246  | -0.691768 | 0.001574  |
| H | -2.591532 | -1.480045 | -0.000296 |

S<sub>0</sub> geometry with relative electronic energy 4.08 eV labeled **I5** in Fig. 7 of the main text

E(S<sub>0</sub>) = -235.474140560 a.u.

|   |           |           |           |
|---|-----------|-----------|-----------|
| N | -2.945911 | -0.148588 | -0.102278 |
| B | -0.525600 | -0.209036 | 0.004277  |
| C | 0.687666  | -0.888779 | -0.058919 |
| C | 2.057798  | -0.400752 | 0.103311  |
| C | 2.484220  | 0.851985  | -0.095329 |
| C | -1.868656 | 0.505700  | 0.121876  |
| H | -3.766910 | 0.456323  | 0.027410  |
| H | 1.815738  | 1.638349  | -0.456952 |
| H | 0.570405  | -1.970881 | -0.216790 |
| H | 2.791599  | -1.149471 | 0.420295  |
| H | 3.524818  | 1.126037  | 0.085033  |
| H | -1.852445 | 1.576015  | 0.409933  |

S<sub>0</sub> geometry with relative electronic energy 2.80 eV labeled **P1** in Fig. 7 of the main text

E(S<sub>0</sub>) = -235.521086390 a.u.

|   |           |           |           |
|---|-----------|-----------|-----------|
| N | -1.322575 | -0.596780 | -0.204670 |
| B | -1.291098 | 0.792739  | -0.330142 |
| C | 0.091388  | 0.875851  | 0.500544  |



|   |           |           |           |
|---|-----------|-----------|-----------|
| C | 1.364043  | 0.582279  | -0.280676 |
| C | 1.223044  | -0.749837 | -0.261143 |
| C | -0.062803 | -0.685215 | 0.551518  |
| H | -1.851444 | -1.371590 | -0.584897 |
| H | -2.053486 | 1.544536  | -0.873206 |
| H | 0.170749  | 1.459203  | 1.427131  |
| H | 2.101352  | 1.246879  | -0.737139 |
| H | 1.772532  | -1.576040 | -0.715875 |
| H | -0.120222 | -1.227689 | 1.505927  |

$S_0$  geometry with relative electronic energy 3.96 eV labeled **P2** in Fig. 7 of the main text

$E(S_0) = -235.478277909$  a.u.

|   |           |           |           |
|---|-----------|-----------|-----------|
| N | 1.468699  | 0.081573  | 0.066347  |
| B | 0.594197  | 1.226238  | 0.137478  |
| C | -0.970109 | 1.008872  | -0.109438 |
| C | -1.487060 | -0.247127 | -0.101226 |
| C | -0.409490 | -1.145936 | 0.444039  |
| C | 0.684579  | -1.016486 | -0.348651 |
| H | 2.451415  | 0.173062  | -0.181724 |
| H | 1.095079  | 2.315665  | 0.268100  |
| H | -1.635072 | 1.860407  | -0.301068 |
| H | -2.530774 | -0.495891 | -0.318199 |
| H | -0.203784 | -0.922214 | 1.500361  |
| H | 0.663741  | -1.229171 | -1.427639 |

$S_0$  geometry with relative electronic energy 3.26 eV labeled **P3** in Fig. 7 of the main text

$E(S_0) = -235.504347546$  a.u.

|   |           |           |           |
|---|-----------|-----------|-----------|
| N | 1.277400  | -0.068432 | 0.754005  |
| B | -0.617603 | 1.309225  | -0.030118 |
| C | -1.565589 | 0.093072  | 0.113992  |
| C | -0.838134 | -1.034503 | -0.050572 |
| C | 0.596039  | -0.765779 | -0.363188 |
| C | 0.781169  | 0.703330  | -0.433568 |
| H | 2.290330  | -0.190142 | 0.650787  |
| H | -0.864716 | 2.466295  | 0.184673  |
| H | -2.614073 | 0.062828  | 0.416730  |
| H | -1.211469 | -2.053964 | 0.088932  |
| H | 1.176722  | -1.465530 | -0.967549 |
| H | 1.528512  | 1.136690  | -1.101010 |

$S_0$  geometry with relative electronic energy 3.25 eV labeled **P4** in Fig. 7 of the main text

$E(S_0) = -235.504558743$  a.u.

|   |           |           |           |
|---|-----------|-----------|-----------|
| N | 2.385028  | 0.339416  | -0.107228 |
| B | -0.025668 | -0.130616 | -0.206646 |
| C | -0.809546 | 1.164331  | -0.179204 |
| C | -1.781894 | 0.342218  | 0.303226  |
| C | -1.361286 | -1.016966 | -0.215476 |
| C | 1.450906  | -0.475905 | 0.204900  |
| H | 3.301632  | -0.040183 | 0.170559  |
| H | -1.473047 | -1.878448 | 0.459690  |
| H | -0.693053 | 2.240695  | -0.069124 |
| H | -2.573201 | 0.554405  | 1.035843  |

|   |           |           |           |
|---|-----------|-----------|-----------|
| H | -1.782898 | -1.240363 | -1.202313 |
| H | 1.664638  | -1.441003 | 0.708494  |

S<sub>0</sub> geometry with relative electronic energy 3.81 eV labeled **TS1** in Fig. 7 of the main text

$E(S_0) = -235.483653817$  a.u.

Imaginary frequency = 575.7054i cm<sup>-1</sup>

|   |           |           |           |
|---|-----------|-----------|-----------|
| N | 1.455493  | -0.141275 | -0.449489 |
| B | 0.625274  | 1.208913  | -0.028613 |
| C | -0.819443 | 1.163845  | 0.117892  |
| C | -1.471050 | -0.112828 | -0.112058 |
| C | -0.661170 | -1.183965 | -0.029664 |
| C | 0.706881  | -0.806220 | 0.404245  |
| H | 2.419084  | -0.024403 | -0.130228 |
| H | 1.423310  | 2.070307  | 0.221890  |
| H | -1.418574 | 2.046966  | 0.348047  |
| H | -2.518119 | -0.196278 | -0.419239 |
| H | -0.851986 | -2.192552 | -0.399225 |
| H | 1.100159  | -1.124683 | 1.385758  |

S<sub>0</sub> geometry with relative electronic energy 3.75 eV labeled **TS2** in Fig. 7 of the main text

$E(S_0) = -235.486101678$  a.u.

Imaginary frequency = 292.2099i cm<sup>-1</sup>

|   |           |           |           |
|---|-----------|-----------|-----------|
| N | 1.368164  | -0.530521 | -0.459074 |
| B | 1.014712  | 0.904523  | -0.188618 |
| C | -0.441620 | 1.161853  | 0.097686  |
| C | -1.503240 | 0.192769  | -0.216359 |
| C | -0.952318 | -1.000875 | 0.022216  |
| C | 0.387918  | -0.613652 | 0.550052  |
| H | 2.316872  | -0.705180 | -0.131636 |
| H | 1.861781  | 1.675492  | 0.183603  |
| H | -0.688194 | 2.071781  | 0.661404  |
| H | -2.487094 | 0.436377  | -0.623598 |
| H | -1.247854 | -2.011011 | -0.264350 |
| H | 0.649340  | -0.717004 | 1.609616  |

S<sub>0</sub> geometry with relative electronic energy 4.01 eV labeled **TS3** in Fig. 7 of the main text

$E(S_0) = -235.476667788$  a.u.

Imaginary frequency = 206.8320i cm<sup>-1</sup>

|   |           |           |           |
|---|-----------|-----------|-----------|
| N | -1.472891 | -0.123656 | -0.277579 |
| B | -0.747832 | 1.137825  | -0.107171 |
| C | 0.815984  | 1.103357  | 0.090068  |
| C | 1.504516  | -0.085927 | -0.000953 |
| C | 0.583232  | -1.197286 | -0.194906 |
| C | -0.573389 | -0.901428 | 0.482439  |
| H | -2.469987 | -0.122699 | -0.069772 |
| H | -1.387754 | 2.160089  | -0.066682 |
| H | 1.389254  | 2.036613  | 0.164021  |
| H | 2.590727  | -0.126926 | -0.147472 |
| H | 0.491717  | -1.552409 | -1.231421 |
| H | -0.546608 | -0.730489 | 1.570341  |

S<sub>0</sub> geometry with relative electronic energy 4.12 eV labeled **TS4** in Fig. 7 of the main text

$E(S_0) = -235.472637056$  a.u.

Imaginary frequency =  $386.8801i$   $\text{cm}^{-1}$

|   |           |           |           |
|---|-----------|-----------|-----------|
| N | 1.199417  | 0.033367  | 0.721541  |
| B | 0.410859  | 1.131541  | -0.200322 |
| C | -1.120388 | 0.919680  | -0.012770 |
| C | -1.395903 | -0.434142 | 0.080876  |
| C | -0.212623 | -1.166313 | -0.103789 |
| C | 0.897941  | -0.333157 | -0.623225 |
| H | 2.201325  | 0.097693  | 0.931433  |
| H | 0.988490  | 2.155059  | -0.451305 |
| H | -1.916302 | 1.662317  | 0.102005  |
| H | -2.330843 | -0.875110 | 0.431502  |
| H | -0.058313 | -2.194275 | 0.234472  |
| H | 1.651260  | -0.653367 | -1.343830 |

$S_0$  geometry with relative electronic energy 3.46 eV labeled **TS5** in Fig. 7 of the main text

$E(S_0) = -235.496643653$  a.u.

Imaginary frequency =  $194.8184i$   $\text{cm}^{-1}$

|   |           |           |           |
|---|-----------|-----------|-----------|
| N | 1.004129  | -0.016263 | 0.761693  |
| B | -0.012030 | 1.277414  | -0.071385 |
| C | -1.409686 | 0.534692  | 0.031260  |
| C | -1.156258 | -0.782354 | -0.030926 |
| C | 0.322268  | -0.991497 | -0.146756 |
| C | 0.978401  | 0.232229  | -0.697367 |
| H | 1.921595  | -0.237249 | 1.153480  |
| H | 0.277387  | 2.416696  | 0.169554  |
| H | -2.407159 | 0.944073  | 0.197098  |
| H | -1.860902 | -1.610122 | 0.067102  |
| H | 0.780227  | -1.977674 | -0.240020 |
| H | 1.911752  | 0.232628  | -1.259408 |

$S_0$  geometry with relative electronic energy 6.53 eV labeled **TS6** in Fig. 7 of the main text

$E(S_0) = -235.384109021$  a.u.

Imaginary frequency =  $126.1113i$   $\text{cm}^{-1}$

|   |           |           |           |
|---|-----------|-----------|-----------|
| N | -1.606039 | -0.086218 | 0.596559  |
| B | -0.812072 | 0.820989  | -0.448273 |
| C | 0.685519  | 1.138433  | -0.022345 |
| C | 1.618318  | 0.145872  | 0.196137  |
| C | 1.259934  | -1.179909 | -0.064989 |
| C | -1.186756 | -0.713461 | -0.436785 |
| H | -1.947107 | -0.419038 | 1.496545  |
| H | -1.454716 | 1.639135  | -1.060118 |
| H | 1.031277  | 2.175612  | 0.078558  |
| H | 2.633068  | 0.407051  | 0.535326  |
| H | 2.075490  | -1.890813 | -0.291487 |
| H | -1.297465 | -1.758974 | -0.725478 |

$S_0$  geometry with relative electronic energy 6.67 eV labeled **TS7** in Fig. 7 of the main text

$E(S_0) = -235.378889579$  a.u.

Imaginary frequency =  $71.6223i$   $\text{cm}^{-1}$

|   |           |           |          |
|---|-----------|-----------|----------|
| N | -2.177463 | -0.271987 | 0.006486 |
| B | -0.630724 | 0.001431  | 0.620556 |

|   |           |           |           |
|---|-----------|-----------|-----------|
| C | 0.515723  | -0.863477 | -0.019831 |
| C | 1.818326  | -0.404932 | -0.214989 |
| C | 2.258727  | 0.865462  | 0.046837  |
| C | -1.606234 | 0.811628  | -0.317170 |
| H | -3.093927 | -0.621692 | -0.276886 |
| H | -0.628960 | 0.273674  | 1.797005  |
| H | 0.322734  | -1.908843 | -0.289143 |
| H | 2.557325  | -1.101589 | -0.649095 |
| H | 3.282113  | 1.186872  | 0.271880  |
| H | -1.962680 | 1.616252  | -0.971023 |

$S_0$  geometry with relative electronic energy 6.48 eV labeled **TS8** in Fig. 7 of the main text

$E(S_0) = -235.385726198$  a.u.

Imaginary frequency = 581.6152i  $\text{cm}^{-1}$

|   |           |           |           |
|---|-----------|-----------|-----------|
| N | 2.527650  | 0.398580  | -0.056793 |
| B | 0.228073  | -0.345991 | 0.272437  |
| C | -0.592530 | 0.901810  | 0.144195  |
| C | -1.902970 | 0.512954  | -0.102407 |
| C | -2.272428 | -0.814616 | 0.056067  |
| C | 1.733421  | -0.604927 | -0.080049 |
| H | 3.497354  | 0.097722  | -0.231854 |
| H | -0.520905 | -1.281610 | 0.650203  |
| H | -0.265739 | 1.936042  | 0.032347  |
| H | -2.676343 | 1.207391  | -0.469109 |
| H | -2.757514 | -1.358986 | -0.771505 |
| H | 2.096273  | -1.632001 | -0.281549 |

$S_0$  geometry with relative electronic energy 4.21 eV labeled **TS9** in Fig. 7 of the main text

$E(S_0) = -235.469381730$  a.u.

Imaginary frequency = 227.0296i  $\text{cm}^{-1}$

|   |           |           |           |
|---|-----------|-----------|-----------|
| N | -2.588298 | 0.062151  | -0.230340 |
| B | -0.193066 | 0.438251  | -0.056512 |
| C | 0.948887  | 1.236224  | -0.153858 |
| C | 1.790176  | 0.120574  | 0.256671  |
| C | 1.598190  | -1.111601 | -0.290385 |
| C | -1.489975 | -0.296547 | 0.317964  |
| H | -3.371098 | -0.490350 | 0.143946  |
| H | 1.116327  | -1.218000 | -1.262444 |
| H | 1.237164  | 2.281645  | -0.157605 |
| H | 2.446581  | 0.225399  | 1.132173  |
| H | 1.995338  | -2.012857 | 0.183580  |
| H | -1.424561 | -1.104051 | 1.072935  |

## 5.2. 1-silyl-2-chloroazaborine

$S_0$  geometry with relative electronic energy 0 eV in Fig. 6 of the main text

$E(S_0) = -986.031147901$  a.u.

$E(S_1) = -985.851212998$  a.u.

|   |           |           |           |
|---|-----------|-----------|-----------|
| N | -0.041349 | 0.658470  | 0.000300  |
| B | 0.071150  | -0.772152 | 0.000079  |
| C | 1.441516  | -1.394726 | -0.000296 |

|    |           |           |           |
|----|-----------|-----------|-----------|
| C  | 2.518532  | -0.551526 | -0.000203 |
| C  | 2.353702  | 0.864913  | 0.000116  |
| C  | 1.110439  | 1.417296  | 0.000344  |
| H  | 1.605811  | -2.474046 | -0.000631 |
| H  | 3.539228  | -0.946761 | -0.000538 |
| H  | 3.222323  | 1.522848  | 0.000204  |
| H  | 0.979969  | 2.501057  | 0.000685  |
| Si | -1.647861 | 1.483474  | -0.000270 |
| H  | -2.407457 | 1.128735  | 1.225667  |
| H  | -1.321094 | 2.938013  | -0.000279 |
| H  | -2.406612 | 1.128215  | -1.226535 |
| Cl | -1.456092 | -1.725350 | 0.000173  |

$S_1$  geometry with relative electronic energy 4.57 eV in Fig. 6 of the main text

$E(S_0) = -985.960666250$  a.u.

$E(S_1) = -985.863100540$  a.u.

|    |           |           |           |
|----|-----------|-----------|-----------|
| N  | -0.236492 | -0.700218 | -0.177351 |
| B  | 0.218744  | 0.734405  | -0.162899 |
| C  | 1.664793  | 1.050041  | -0.446556 |
| C  | 2.604150  | -0.000135 | -0.306301 |
| C  | 2.128795  | -1.149768 | 0.310674  |
| C  | 0.728639  | -1.280459 | 0.598051  |
| H  | 2.016238  | 2.058742  | -0.677694 |
| H  | 3.653404  | 0.097416  | -0.589078 |
| H  | 2.793460  | -1.949710 | 0.647980  |
| H  | 0.421441  | -1.982981 | 1.385445  |
| Si | -1.915954 | -1.276479 | -0.249305 |
| H  | -1.830048 | -2.748089 | -0.479558 |
| H  | -2.653899 | -1.033944 | 1.026743  |
| H  | -2.580036 | -0.582455 | -1.381863 |
| Cl | -1.011397 | 1.971950  | 0.275237  |

$S_1$  geometry with relative electronic energy 4.59 eV in Fig. 6 of the main text

$E(S_0) = -985.920071453$  a.u.

$E(S_1) = -985.862360761$  a.u.

Imaginary frequency = 288.2017i  $\text{cm}^{-1}$

|    |           |           |           |
|----|-----------|-----------|-----------|
| N  | 0.243341  | -0.718582 | -0.248990 |
| B  | -0.252939 | 0.706456  | -0.158627 |
| C  | -1.700709 | 1.018712  | -0.422949 |
| C  | -2.619634 | -0.056887 | -0.292871 |
| C  | -2.109221 | -1.187731 | 0.299790  |
| C  | -0.691956 | -1.179183 | 0.631731  |
| H  | -2.065579 | 2.026154  | -0.634205 |
| H  | -3.665407 | 0.010701  | -0.599481 |
| H  | -2.708786 | -2.059614 | 0.573010  |
| H  | -0.356922 | -1.724822 | 1.527840  |
| Si | 1.946166  | -1.239378 | -0.233557 |
| H  | 1.916692  | -2.709907 | -0.481622 |
| H  | 2.646002  | -0.519428 | -1.325810 |
| H  | 2.595663  | -0.988373 | 1.087689  |
| Cl | 0.981320  | 1.955583  | 0.256720  |

S<sub>1</sub>/S<sub>0</sub> Cl geometry with relative electronic energy 4.18 eV in Fig. 6 of the main text

E(S<sub>0</sub>) = -985.879160627 a.u.

E(S<sub>1</sub>) = -985.876176215 a.u.

|    |           |           |           |
|----|-----------|-----------|-----------|
| N  | -0.194626 | -0.724072 | -0.257598 |
| B  | 0.223278  | 0.719654  | -0.124200 |
| C  | 1.662910  | 1.119463  | -0.159266 |
| C  | 2.640113  | 0.064905  | -0.242779 |
| C  | 2.186159  | -1.152912 | 0.111492  |
| C  | 0.775276  | -1.142479 | 0.612945  |
| H  | 1.981198  | 2.164602  | -0.145250 |
| H  | 3.658504  | 0.231912  | -0.604764 |
| H  | 2.724167  | -2.093799 | -0.023949 |
| H  | 0.508313  | -1.568646 | 1.588823  |
| Si | -1.879021 | -1.309156 | -0.163125 |
| H  | -2.639946 | -0.700910 | -1.281657 |
| H  | -1.787806 | -2.789256 | -0.317892 |
| H  | -2.504520 | -0.997240 | 1.155794  |
| Cl | -1.116140 | 1.895170  | 0.141322  |

S<sub>0</sub> geometry with relative electronic energy 2.50 eV in Fig. 6 of the main text

E(S<sub>0</sub>) = -985.939169363 a.u.

|    |           |           |           |
|----|-----------|-----------|-----------|
| N  | 0.238970  | 0.605409  | 0.254618  |
| B  | 0.178513  | -0.800342 | 0.209271  |
| C  | -1.362541 | -0.883319 | 0.602386  |
| C  | -2.350770 | -0.612502 | -0.523515 |
| C  | -2.201356 | 0.718780  | -0.505635 |
| C  | -1.204826 | 0.676921  | 0.640598  |
| H  | -1.698788 | -1.441791 | 1.484732  |
| H  | -2.933475 | -1.291888 | -1.149106 |
| H  | -2.580015 | 1.531566  | -1.127183 |
| H  | -1.401784 | 1.247389  | 1.558344  |
| Si | 1.356318  | 1.917261  | -0.115181 |
| H  | 2.662071  | 1.311534  | -0.488336 |
| H  | 0.818135  | 2.741050  | -1.238921 |
| H  | 1.506740  | 2.795702  | 1.082699  |
| Cl | 1.458251  | -1.962979 | -0.154199 |

S<sub>0</sub> geometry with relative electronic energy 3.97 eV in Fig. 6 of the main text

E(S<sub>0</sub>) = -985.885400615 a.u.

Imaginary frequency = 675.2052i cm<sup>-1</sup>

|    |           |           |           |
|----|-----------|-----------|-----------|
| N  | 0.174037  | -0.761530 | -0.305119 |
| B  | -0.282500 | 0.755542  | -0.144703 |
| C  | -1.686224 | 1.131963  | -0.039132 |
| C  | -2.659792 | 0.070887  | -0.185189 |
| C  | -2.184286 | -1.164394 | 0.053347  |
| C  | -0.778941 | -1.129442 | 0.540342  |
| H  | -2.004333 | 2.166932  | 0.097318  |
| H  | -3.672282 | 0.247870  | -0.559475 |
| H  | -2.600381 | -2.115083 | -0.287620 |
| H  | -0.523783 | -1.493834 | 1.554739  |
| Si | 1.897397  | -1.260680 | -0.105277 |
| H  | 1.865406  | -2.735570 | -0.321521 |

|    |          |           |           |
|----|----------|-----------|-----------|
| H  | 2.705748 | -0.592454 | -1.149252 |
| H  | 2.382910 | -0.978998 | 1.275325  |
| Cl | 1.137227 | 1.838211  | 0.088677  |

### 5.3. Benzene

$S_0$  geometry with relative electronic energy 0 eV in Fig. 6 of the main text

$E(S_0) = -232.189104862$  a.u.

$E(S_1) = -231.985712633$  a.u.

|   |           |           |           |
|---|-----------|-----------|-----------|
| C | 0.000000  | 1.393025  | -0.000000 |
| C | 1.206395  | 0.696512  | -0.000000 |
| C | 1.206395  | -0.696512 | -0.000000 |
| C | -0.000000 | -1.393025 | -0.000000 |
| C | -1.206395 | -0.696512 | -0.000000 |
| C | -1.206395 | 0.696512  | -0.000000 |
| H | 0.000000  | 2.484890  | -0.000000 |
| H | 2.151978  | 1.242445  | -0.000000 |
| H | 2.151978  | -1.242445 | -0.000000 |
| H | -0.000000 | -2.484890 | -0.000000 |
| H | -2.151978 | -1.242445 | -0.000000 |
| H | -2.151978 | 1.242445  | -0.000000 |

$S_1$  geometry with relative electronic energy 5.47 eV in Fig. 6 of the main text

$E(S_0) = -232.182004010$  a.u.

$E(S_1) = -231.988104390$  a.u.

|   |           |           |           |
|---|-----------|-----------|-----------|
| C | -1.301000 | 0.575854  | 0.000012  |
| C | -1.149207 | -0.838764 | 0.000018  |
| C | 0.151792  | -1.414611 | 0.000006  |
| C | 1.301000  | -0.575855 | -0.000012 |
| C | 1.149205  | 0.838766  | -0.000018 |
| C | -0.151790 | 1.414610  | -0.000006 |
| H | -2.297584 | 1.016977  | 0.000022  |
| H | -2.029519 | -1.481276 | 0.000032  |
| H | 0.268071  | -2.498240 | 0.000010  |
| H | 2.297584  | -1.016979 | -0.000022 |
| H | 2.029510  | 1.481286  | -0.000032 |
| H | -0.268063 | 2.498239  | -0.000010 |

$S_1$  geometry with relative electronic energy 5.69 eV in Fig. 6 of the main text

$E(S_0) = -232.106070922$  a.u.

$E(S_1) = -231.980182592$  a.u.

Imaginary frequency =  $77.2944i$   $\text{cm}^{-1}$

|   |           |           |           |
|---|-----------|-----------|-----------|
| C | -1.457168 | -0.000000 | -0.389333 |
| C | -0.703065 | 1.111596  | 0.135655  |
| C | 0.708569  | 1.177542  | 0.036921  |
| C | 1.454202  | 0.000000  | -0.135533 |
| C | 0.708569  | -1.177542 | 0.036921  |
| C | -0.703065 | -1.111596 | 0.135655  |
| H | -2.542966 | -0.000000 | -0.293762 |
| H | -1.220206 | 1.900227  | 0.698035  |
| H | 1.203104  | 2.147649  | 0.140895  |

|   |           |           |           |
|---|-----------|-----------|-----------|
| H | 2.528911  | 0.000000  | -0.305818 |
| H | 1.203104  | -2.147649 | 0.140895  |
| H | -1.220205 | -1.900227 | 0.698035  |

$S_1/S_0$  CI geometry with relative electronic energy 5.64 eV in Fig. 6 of the main text

$E(S_0) = -231.981422886$  a.u.

$E(S_1) = -231.982165646$  a.u.

|   |           |           |           |
|---|-----------|-----------|-----------|
| C | 1.465195  | -0.003750 | -0.579512 |
| C | 0.695731  | -0.893595 | 0.254463  |
| C | -0.725021 | -1.141168 | 0.051772  |
| C | -1.470559 | 0.000715  | -0.169495 |
| C | -0.722241 | 1.142849  | 0.040525  |
| C | 0.700822  | 0.893524  | 0.249868  |
| H | 2.554948  | -0.021448 | -0.537393 |
| H | 1.268300  | -1.573450 | 0.892431  |
| H | -1.130728 | -2.147525 | 0.037937  |
| H | -2.521833 | 0.000173  | -0.441779 |
| H | -1.093265 | 2.167780  | 0.066141  |
| H | 1.259016  | 1.583022  | 0.896934  |

$S_0$  geometry with relative electronic energy 3.63 eV in Fig. 6 of the main text

$E(S_0) = -232.055816672$  a.u.

|   |           |           |           |
|---|-----------|-----------|-----------|
| C | 1.302244  | 0.669065  | -0.265009 |
| C | 1.302342  | -0.668733 | -0.265153 |
| C | 0.000038  | -0.784198 | 0.523120  |
| C | -1.302346 | -0.668746 | -0.265362 |
| C | -1.302212 | 0.669094  | -0.264932 |
| C | 0.000018  | 0.783614  | 0.523689  |
| H | 1.955469  | 1.421215  | -0.711245 |
| H | 1.956045  | -1.420695 | -0.711019 |
| H | -0.000180 | -1.353137 | 1.462346  |
| H | -1.956271 | -1.420810 | -0.710926 |
| H | -1.955408 | 1.421518  | -0.710929 |
| H | -0.000155 | 1.351327  | 1.463663  |

$S_0$  geometry with relative electronic energy 4.93 eV in Fig. 6 of the main text

$E(S_0) = -232.007624167$  a.u.

Imaginary frequency = 477.9972i  $\text{cm}^{-1}$

|   |           |           |           |
|---|-----------|-----------|-----------|
| C | -1.245835 | -0.778016 | -0.167949 |
| C | -1.289963 | 0.581844  | -0.205045 |
| C | -0.000187 | 1.135413  | 0.221708  |
| C | 1.289779  | 0.582107  | -0.205093 |
| C | 1.246099  | -0.777726 | -0.167874 |
| C | 0.000086  | -0.907311 | 0.572299  |
| H | -1.798576 | -1.520287 | -0.742824 |
| H | -2.116173 | 1.219181  | -0.539037 |
| H | -0.000265 | 2.140336  | 0.665192  |
| H | 2.115752  | 1.219642  | -0.539282 |
| H | 1.799351  | -1.519890 | -0.742387 |
| H | 0.000038  | -0.556845 | 1.610063  |

#### 5.4. 1-silyl-2-chlorobenzene



S<sub>0</sub> geometry with relative electronic energy 0 eV in Fig. 6 of the main text

$E(S_0) = -982.530470826$  a.u.

$E(S_1) = -982.337812977$  a.u.

|    |           |           |           |
|----|-----------|-----------|-----------|
| C  | 0.116575  | 0.669386  | -0.000089 |
| C  | -0.165937 | -0.700025 | 0.000051  |
| C  | -1.463569 | -1.197912 | 0.000040  |
| C  | -2.530363 | -0.304453 | -0.000105 |
| C  | -2.291594 | 1.066292  | -0.000251 |
| C  | -0.983004 | 1.539878  | -0.000241 |
| H  | -1.629547 | -2.274921 | 0.000150  |
| H  | -3.552360 | -0.686977 | -0.000112 |
| H  | -3.126148 | 1.769193  | -0.000371 |
| H  | -0.806105 | 2.617490  | -0.000352 |
| Si | 1.878760  | 1.353868  | -0.000017 |
| H  | 2.625750  | 0.919718  | -1.215220 |
| H  | 1.760715  | 2.842891  | -0.000089 |
| H  | 2.625564  | 0.919809  | 1.215333  |
| Cl | 1.159226  | -1.852962 | 0.000263  |

S<sub>1</sub> geometry with relative electronic energy 5.15 eV in Fig. 6 of the main text

$E(S_0) = -982.522806498$  a.u.

$E(S_1) = -982.341310439$  a.u.

|    |           |           |           |
|----|-----------|-----------|-----------|
| C  | -0.200221 | -0.680410 | -0.000059 |
| C  | 0.192838  | 0.697928  | 0.000062  |
| C  | 1.536785  | 1.149461  | 0.000038  |
| C  | 2.589373  | 0.199276  | -0.000118 |
| C  | 2.245656  | -1.173395 | -0.000250 |
| C  | 0.895842  | -1.604591 | -0.000224 |
| H  | 1.735226  | 2.219850  | 0.000136  |
| H  | 3.628497  | 0.521429  | -0.000138 |
| H  | 3.036353  | -1.925428 | -0.000374 |
| H  | 0.686992  | -2.674697 | -0.000332 |
| Si | -1.972958 | -1.266445 | -0.000012 |
| H  | -2.733147 | -0.805935 | -1.204680 |
| H  | -1.925100 | -2.759762 | -0.000130 |
| H  | -2.733019 | -0.806116 | 1.204805  |
| Cl | -1.037413 | 1.907722  | 0.000246  |

S<sub>1</sub> geometry with relative electronic energy 5.37 eV in Fig. 6 of the main text

$E(S_0) = -982.395451189$  a.u.

$E(S_1) = -982.333227980$  a.u.

Imaginary frequency = 244.8654i cm<sup>-1</sup>

|   |           |           |           |
|---|-----------|-----------|-----------|
| C | 0.426394  | -0.695014 | -0.211136 |
| C | -0.324461 | 0.527489  | -0.195661 |
| C | -1.687902 | 0.653523  | -0.616739 |
| C | -2.522772 | -0.442809 | -0.394644 |
| C | -1.926899 | -1.416612 | 0.393305  |
| C | -0.527609 | -1.255476 | 0.703603  |
| H | -2.036377 | 1.600152  | -1.032116 |
| H | -3.548570 | -0.496110 | -0.755032 |
| H | -2.479618 | -2.253269 | 0.825965  |

|    |           |           |           |
|----|-----------|-----------|-----------|
| H  | -0.189628 | -1.617181 | 1.687759  |
| Si | 2.261895  | -0.935431 | -0.256665 |
| H  | 2.530495  | -2.389371 | -0.473686 |
| H  | 2.836831  | -0.134160 | -1.375496 |
| H  | 2.952684  | -0.537263 | 1.015330  |
| Cl | 0.449832  | 2.040979  | 0.331071  |

S<sub>1</sub>/S<sub>0</sub> Cl geometry with relative electronic energy 5.49 eV in Fig. 6 of the main text

E(S<sub>0</sub>) = -982.330651172 a.u.

E(S<sub>1</sub>) = -982.326710373 a.u.

|    |           |           |           |
|----|-----------|-----------|-----------|
| C  | 0.424303  | -0.696071 | -0.278234 |
| C  | -0.398481 | 0.474865  | -0.072823 |
| C  | -1.740577 | 0.662421  | -0.591219 |
| C  | -2.564893 | -0.441503 | -0.364999 |
| C  | -1.931038 | -1.399947 | 0.372411  |
| C  | -0.544743 | -1.079828 | 0.711666  |
| H  | -2.037456 | 1.575176  | -1.105417 |
| H  | -3.587993 | -0.520315 | -0.730057 |
| H  | -2.361871 | -2.332233 | 0.718824  |
| H  | -0.189218 | -1.412996 | 1.702139  |
| Si | 2.281160  | -0.932278 | -0.246322 |
| H  | 2.798092  | -0.657392 | 1.126476  |
| H  | 2.659105  | -2.328884 | -0.627248 |
| H  | 2.914362  | 0.018352  | -1.204731 |
| Cl | 0.494195  | 1.975915  | 0.288689  |

S<sub>0</sub> geometry with relative electronic energy 3.34 eV in Fig. 6 of the main text

E(S<sub>0</sub>) = -982.407816686 a.u.

|    |           |           |           |
|----|-----------|-----------|-----------|
| C  | 0.467847  | 0.499095  | 0.259489  |
| C  | -0.140656 | -0.698166 | 0.244568  |
| C  | -1.531560 | -0.227043 | 0.602493  |
| C  | -2.375609 | 0.329550  | -0.540356 |
| C  | -1.807475 | 1.540247  | -0.502122 |
| C  | -0.861195 | 1.187846  | 0.641415  |
| H  | -2.023555 | -0.665626 | 1.479485  |
| H  | -3.130608 | -0.133281 | -1.177326 |
| H  | -1.921686 | 2.443944  | -1.103000 |
| H  | -0.879151 | 1.787794  | 1.560026  |
| Si | 2.183000  | 1.127392  | -0.129503 |
| H  | 3.066130  | -0.007016 | -0.521656 |
| H  | 2.108358  | 2.119290  | -1.244812 |
| H  | 2.752567  | 1.816245  | 1.067424  |
| Cl | 0.409285  | -2.290236 | -0.145884 |

S<sub>0</sub> geometry with relative electronic energy 4.57 eV in Fig. 6 of the main text

E(S<sub>0</sub>) = -982.362506697 a.u.

Imaginary frequency = 398.0661i cm<sup>-1</sup>

|   |           |           |           |
|---|-----------|-----------|-----------|
| C | -0.306429 | -0.573781 | 0.386645  |
| C | 0.078951  | 0.724665  | 0.183656  |
| C | 1.513712  | 0.916865  | 0.131994  |
| C | 2.404449  | -0.056358 | -0.511196 |
| C | 1.993844  | -1.321221 | -0.236366 |

|    |           |           |           |
|----|-----------|-----------|-----------|
| C  | 1.021261  | -1.002935 | 0.802807  |
| H  | 1.898338  | 1.915179  | 0.369840  |
| H  | 3.228412  | 0.254984  | -1.160886 |
| H  | 2.140915  | -2.246229 | -0.791908 |
| H  | 1.412877  | -0.615987 | 1.749680  |
| Si | -1.809953 | -1.536217 | -0.162711 |
| H  | -2.512044 | -0.826659 | -1.268438 |
| H  | -1.356228 | -2.883950 | -0.622412 |
| H  | -2.754801 | -1.728202 | 0.977335  |
| Cl | -0.997227 | 2.089087  | -0.089442 |
